# Supplementary material for: Physical and Sedentary Activities and Childhood Overweight/Obesity: A Cross-Sectional Study among First-Year Children of Primary Schools in Modena, Italy
Source: MDPI journal article supplement (doi:10.3390/ijerph18063221), 2021-03-20
Supplement: s1 [file s1]

**Table S1.** Sample characteristics (n.588).

| <b>Sample characteristics</b> |                                          | <b>n (%)<sup>a</sup></b> |
|-------------------------------|------------------------------------------|--------------------------|
| <i>Child's sex</i>            | <i>male</i>                              | 313 (53.2)               |
|                               | <i>female</i>                            | 275 (46.8)               |
| <i>Child's weight status</i>  | <i>under/normal weight</i>               | 440 (74.8)               |
|                               | <i>overweight/obese</i>                  | 148 (25.2)               |
| <i>Mother's nationality</i>   | <i>Italian</i>                           | 383 (67.0)               |
|                               | <i>foreign</i>                           | 189 (33.0)               |
| <i>Father's nationality</i>   | <i>Italian</i>                           | 405 (73.4)               |
|                               | <i>foreign</i>                           | 147 (26.6)               |
| <i>Parents' nationality</i>   | <i>both Italian</i>                      | 371 (64.9)               |
|                               | <i>at least one foreign</i>              | 201 (35.1)               |
| <i>Mother's education</i>     | <i>&lt;high school</i>                   | 114 (19.6)               |
|                               | <i>high school</i>                       | 255 (43.8)               |
|                               | <i>university</i>                        | 213 (36.6)               |
| <i>Father's education</i>     | <i>&lt;high school</i>                   | 145 (25.9)               |
|                               | <i>high school</i>                       | 270 (48.2)               |
|                               | <i>university</i>                        | 145 (25.9)               |
| <i>Parents' education</i>     | <i>&lt;high school (both parents)*</i>   | 76 (13.6)                |
|                               | <i>high school (at least one parent)</i> | 234 (41.9)               |
|                               | <i>university (only one parent)</i>      | 145 (25.9)               |
|                               | <i>university (both parents)</i>         | 104 (18.6)               |
| <i>Mother's weight status</i> | <i>under/normal weight</i>               | 366 (65.8)               |
|                               | <i>overweight/obese</i>                  | 190 (34.2)               |
| <i>Father's weight status</i> | <i>normal weight</i>                     | 211 (42.2)               |
|                               | <i>overweight/obese</i>                  | 289 (57.8)               |
| <i>Parents' weight status</i> | <i>both under/normal weight</i>          | 157 (30.0)               |
|                               | <i>at least one overweight/obese</i>     | 366 (70.0)               |

<sup>a</sup>The percentages were calculated excluding missing values.

A:

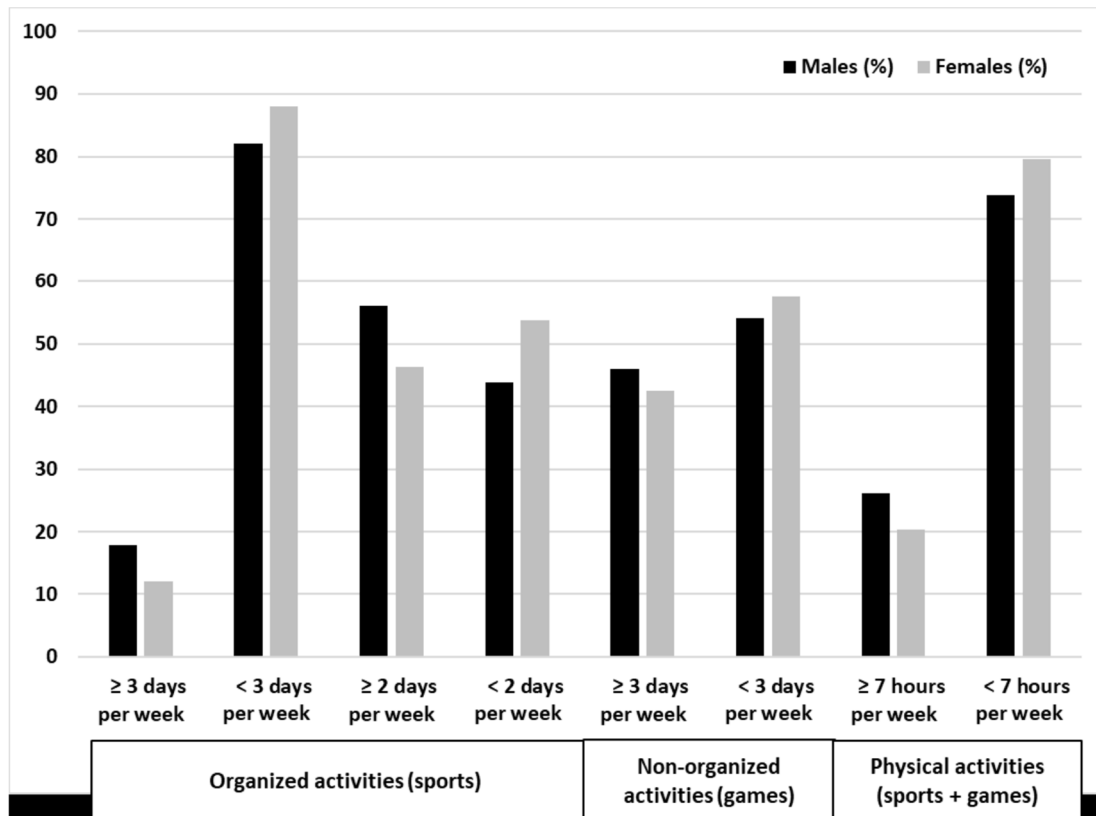

B:

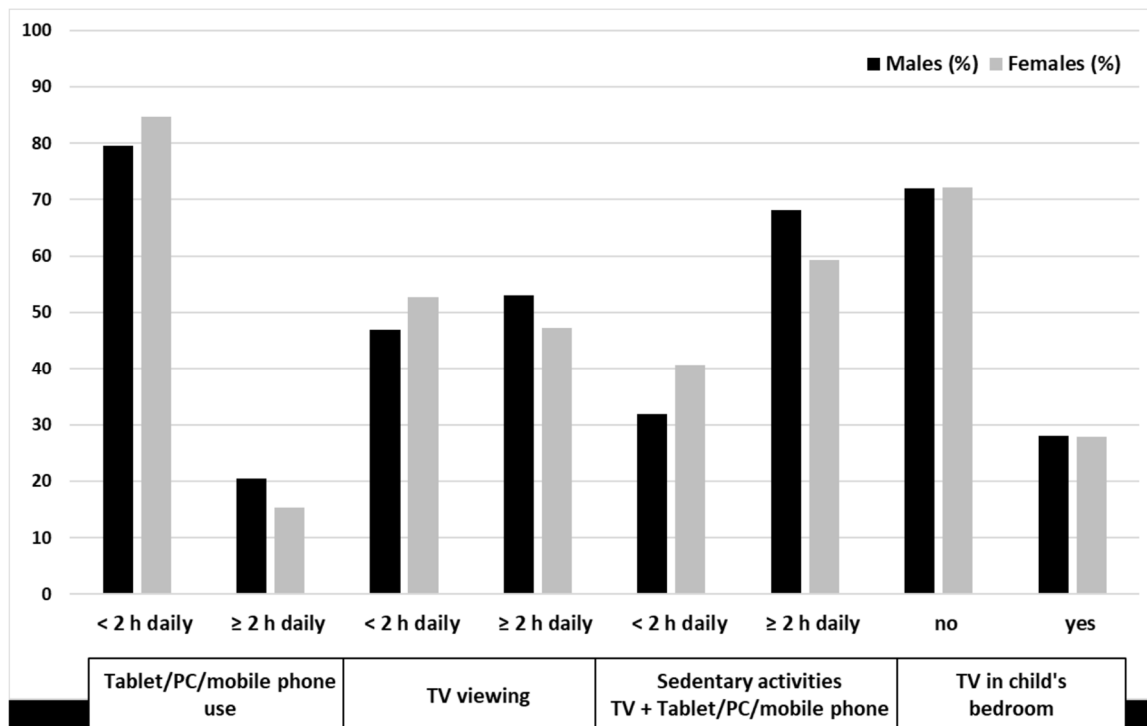

Figure S1: Physical activities (A) and sedentary behaviors (B) by child's sex. Males (n=313) - Females (n=275).
